# Supplementary material
Source: PubMed Central journal article supplement (PMC1356317)
Supplement: 7600878s1.pdf [file 7600878s1.pdf]

## **Supplementary Materials and Methods**

### **Prethymic T cell development defined by the expression of Paired Immunoglobulin-like Receptors**

Kyoko Masuda, Hiromi Kubagawa, Tomokatsu Ikawa, Ching-Cheng Chen, Kiyokazu Kakugawa, Masakazu Hattori, Ryuichiro Kageyama, Max D. Cooper, Nagahiro Minato, Yoshimoto Katsura and Hiroshi Kawamoto

#### ***Mice***

Balb/c mice were purchased from SLC (Shizuoka, Japan). KSN *nu/nu* mice were maintained in our animal facility.

#### ***Coculture with stromal cells***

To assess the potential of single cells for their ability to give rise to B cells, cells were individually cultured on a monolayer of the stromal cell line TSt-4 (Ohmura *et al*, 1999) for 10 days, and B cell generation was determined by examining the CD19 expression. Myeloid potential was assessed similarly, but the stromal cell line used was PA6 (Nishikawa *et al*, 1988), and Mac-1 was used as the myeloid cell marker.

#### ***RT-PCR***

RT-PCR was performed as described previously (Kawamoto *et al*, 2000). Primers and amplicon sizes are shown below. Cycling times and temperatures were as follows: denaturation at 94°C for 30 sec, annealing at 60°C for 30 sec, and elongation at 72°C for 30 sec. Amplification was performed for 25 cycles for  $\beta$ -actin and 35 cycles for others.

Table S1. Oligonucleotide Sequences

**RT-PCR**

**Primers**

| Name           | Sense Primer                    | Antisense Primer             | Product Size (bp) |
|----------------|---------------------------------|------------------------------|-------------------|
| ikaros         | 5'-GAGGCATGGCCAGTAATGTT-3'      | 5'-AGGCCGTTACCAGTATGAC-3'    | 281               |
| PU.1           | 5'-AGATGCACGTCCTCGATACT-3'      | 5'-TTGTGCTTGGACGAGAACTG-3'   | 345               |
| GATA-1         | 5'-TCCCAGTCCTTTCTTCTC-3'        | 5'-ACAATTCCCCTACTGCTGC-3'    | 544               |
| GATA-2         | 5'-TGACCATGAAGAAGGAAGGG-3'      | 5'-AGACTGGAGGAAGGGTGGAT-3'   | 238               |
| GATA-3         | 5'-TCGGCCATTCGTACATGGAA-3'      | 5'-GAGAGCCGTGGTGGATGGAC-3'   | 290               |
| Tcf-1          | 5'-CCAGCTTTCTCCACTCTACG-3'      | 5'-TCAAGGATGGGTGGGTGAAC-3'   | 280               |
| EBF            | 5'-AACTGGCTGTGAATGTCTCG-3'      | 5'-CACATGGGAGGGACAATCA-3'    | 450               |
| Pax5           | 5'-TCCTCGGACCATCAGGACAG-3'      | 5'-CCTGTTGATGGAGCTGACGC-3'   | 394               |
| mb-1           | 5'-GCCAGGGGGTCTAGAAGCCC-3'      | 5'-TCACTTGGCACCCAGTACAA-3'   | 308               |
| $\lambda$ 5    | 5'-TTGAGGGTCAATGAAGCTCAGAAGA-3' | 5'-CTTGGGCTGACCTAGGATTG-3'   | 337               |
| Notch1         | 5'-CCCAGCAGGTGCAGCCACAG-3'      | 5'-GGTGATCTGGGACGGCATGG-3'   | 460               |
| Hes1           | 5'-GCCAGTGTC AACACGACACCGG-3'   | 5'-TCACCTCGTTCATGCACTCG-3'   | 247               |
| Deltex         | 5'-ATCAGTTCGGCAAGACACA-3'       | 5'-TACGCGTTCGGATGGTGAT-3'    | 160               |
| Rag2           | 5'-CCCAGAGAACCACAGAAAAT-3'      | 5'-TAACCACCCACAATAACAAAAT-3' | 336               |
| EpoR           | 5'-CTGACTTGGCCTCAAAGC-3'        | 5'-GCTCTGAGTCTGGGACAAGG-3'   | 275               |
| lck            | 5'-CATTCCTTCAACTTCGTGG-3'       | 5'-TAATGGCGGACTAGATCGTG-3'   | 297               |
| CD3 $\epsilon$ | 5'-ATCACTCTGGGCTTGCTGAT-3'      | 5'-TAGTCTGGGTTGGGAACAGG-3'   | 149               |
| $\beta$ -actin | 5'-TCCTGTGGCATCCATGAAACT-3'     | 5'-GAAGCACTTGCGGTGCACGAT-3'  | 315               |

**PCR analysis of TCR $\beta$ , TCR $\gamma$  and IgH chain gene rearrangement**

DNA equivalent to 1000 cells and 250 cells were used for detection of D-J $\beta$  rearrangement and V-J $\gamma$  rearrangement, respectively. Primers were: D $\beta$ 1, 5'-TTATCTGGTGGTTTCTTCCAGC-3'; D $\beta$ 2, 5'-GCACCTGTGGGGAAGAAACT-3'; J $\beta$ 2.6, 5'-TGAGAGCTGTCTCCTACTATCGATT-3'. V $\gamma$ 4, 5'-AGTGTTTCAGAAGCCCGATGCA-3'; V $\gamma$ 5, 5'-ACAACCTGTGGTGGATTCCAGA-3'; J $\gamma$ 1, 5'-AGAGGGAATTACTATGAGCT-3', V $\gamma$ 1.1, 5'-CTTCCATATTTCTCCAACACAGC-3'; J $\gamma$ 4, 5'-ACTACGAGCTTTGTCCCTTTGG-3'; DSF, 5'-AGGGATCCTTGTGAAGGGATCTACTACTGTG-3'; J $H_4$ , 5'-AAAGACCTGCAGAGGCCATTCTTACC-3'. The reaction volume was 20  $\mu$ l containing 5  $\mu$ l of the cell extract, 1.5  $\mu$ l of 10x PCR buffer, 0.16  $\mu$ l of 25 mM dNTPs, 0.4  $\mu$ l of each primer (10 mM), and 0.6 U of Taq polymerase. Thermocycling conditions were as follows: 5 min at 94°C followed by 35 cycles of 1 min at 94°C, 1 min at 60°C for D-J $\beta$  rearrangement or at 55°C for V-J $\gamma$  rearrangement, 2 min at 72°C, and 10 min at 72°C. To detect immunoglobulin D-J $H$  rearrangement, 1.0 $\mu$ l of each primer (10mM) was added, and the following PCR conditions were used: 35cycles of 1 min at 94°C, 1.5 min at 60°C, and 2 min at 72°C. The elongation time at 72°C was prolonged 3 sec in each cycle; the final elongation step was 10 min.

### Supplementary References

Kawamoto H, Ikawa T, Ohmura K, Fujimoto S, Katsura Y (2000) T cell progenitors emerge earlier than B cell progenitors in the murine fetal liver. *Immunity*, **12**: 441-

Nishikawa S, Ogawa M, Nishikawa S, Kunisada T, Kodama H (1988) B lymphopoiesis on stromal cell clone: stromal cell clones acting on different stages of B cell differentiation. *Eur. J. Immunol*, **18**: 1767-1771

Ohmura K, Kawamoto H, Fujimoto S, Ozaki S, Nakao k, Katsura Y (1999) Emergence of T, B and myeloid lineage-committed as well as multipotent hematopoietic progenitors in the aorta-gonad-mesonephros region of day 10 fetuses of the mouse. *J Immunol*, **163**: 4788-4795
